# Supplementary material
Source: PubMed Central journal article supplement (PMC4976028)
Supplement: NIHMS796927-supplement-1.pdf [file NIHMS796927-supplement-1.pdf]

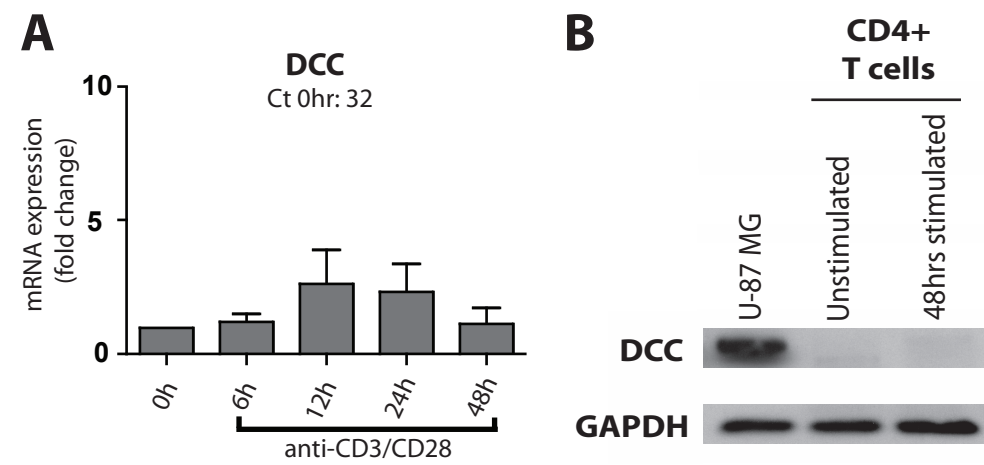

**Figure S1. Expression of Netrin-1 and DCC on CD4+ T-lymphocytes:** DCC (Panel A) expression was analyzed at the mRNA level by quantitative PCR on unactivated and on mitogen-activated human CD4+ T-lymphocytes. Illustrated is the mean fold change in mRNA expression  $\pm$ SEM. Illustrated data is from n=3 independent experiments. (Panel B) Western blot analysis of DCC on positive control cells (U87MG) and on CD4+ T-cells.

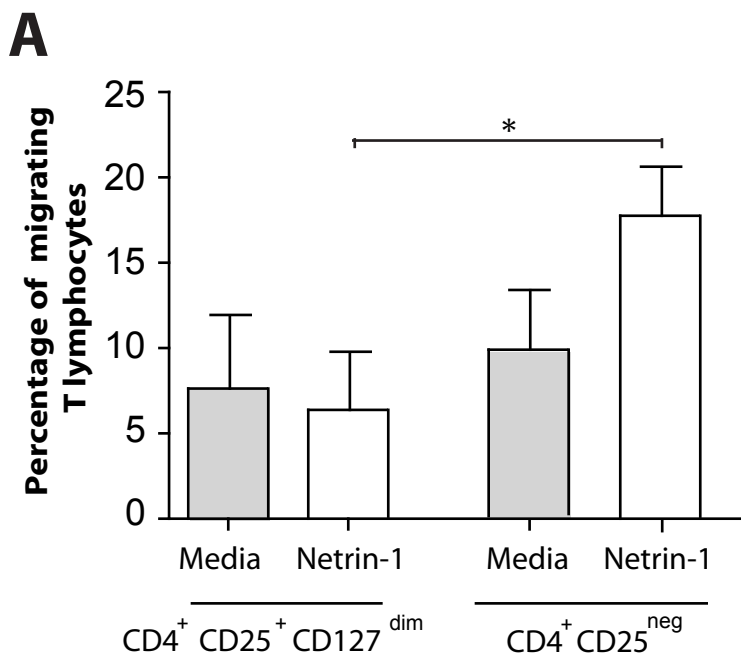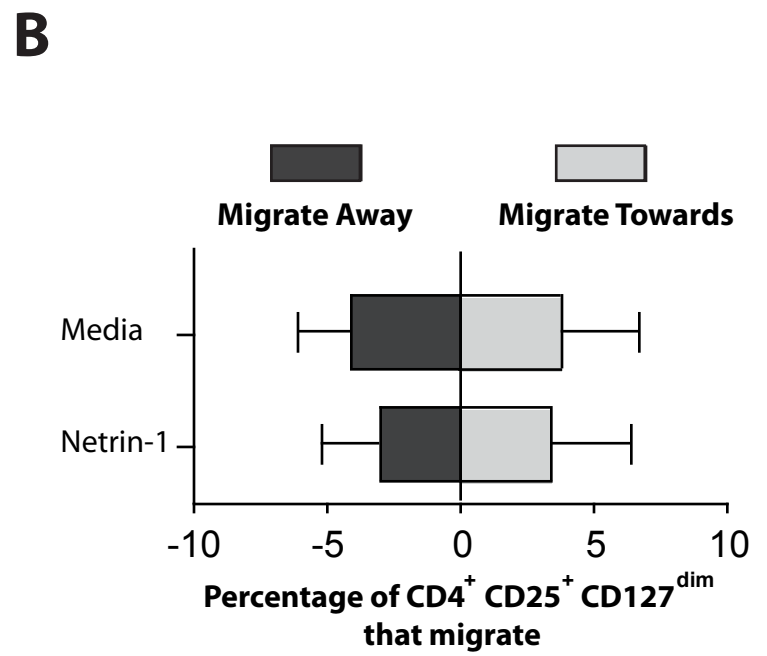

**Figure S2. Minimal effect of Netrin-1 on the migration of T regulatory cells:** Human  $CD4^+ CD25^{neg}$  and  $CD4^+ CD25^+ CD127^{dim}$  cells were isolated from PBMC and introduced into the microfluidic device and exposed to a Netrin-1 gradient ( $0.1 \mu\text{g/mL}$ ) over an 8-hr time period. A) The total percentage of migrating cells in media alone was compared to conditions in which cells were exposed to a Netrin-1 gradient. B) Directionality of migrating Tregs in media alone and in the Netrin-1 gradient. As illustrated Tregulatory cells fail to respond to Netrin-1. Error bars represent  $\text{mean} \pm \text{SEM}$ . Illustrated data is from  $n \geq 3$  independent experiments. \* =  $p < 0.05$ .

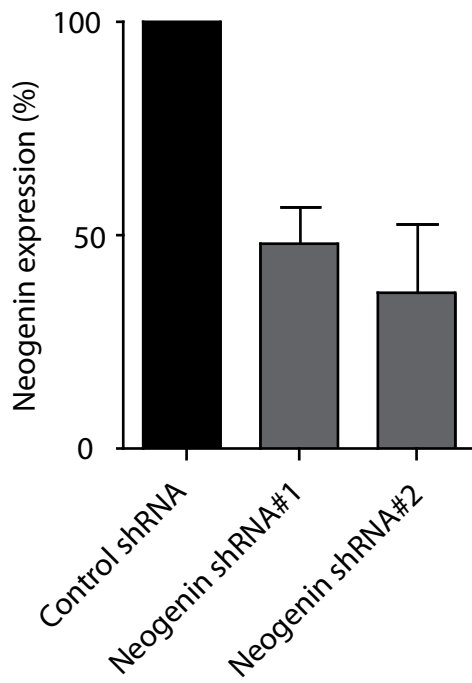

**Figure S3. Knockdown efficiency of Neogenin:** Human CD4+ T-lymphocytes were infected with two lentiviral Neogenin shRNA constructs as described in Methods, and were subsequently mitogen activated for 48hrs. Knockdown efficiency was determined by qPCR.

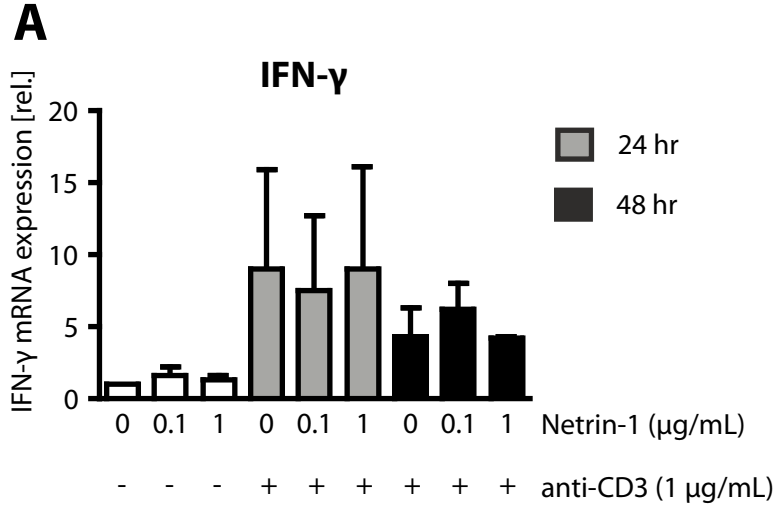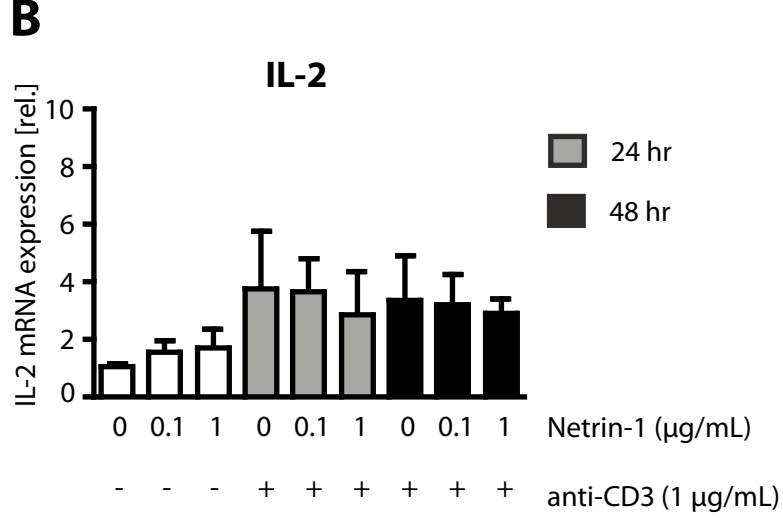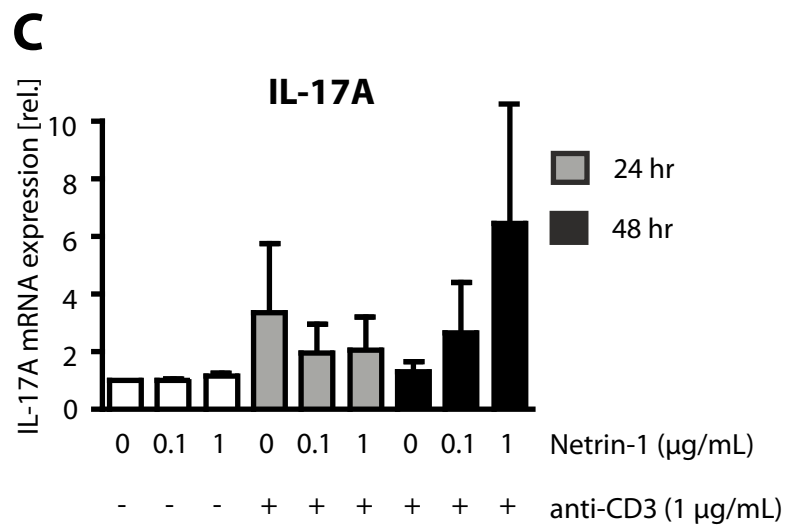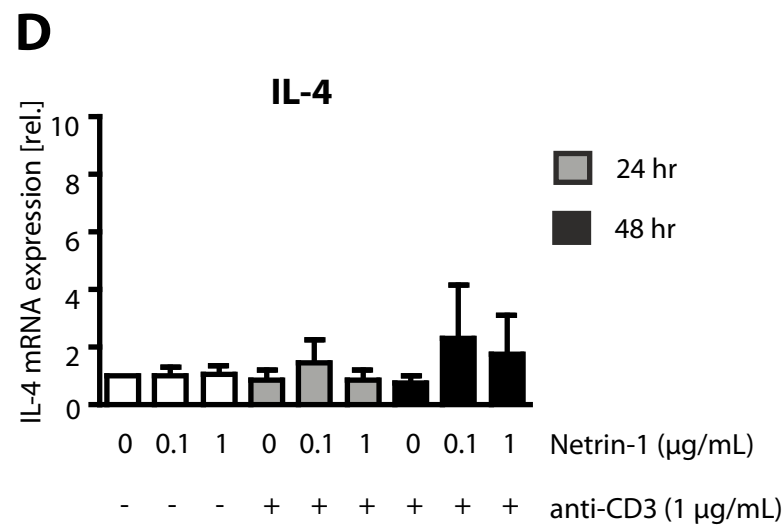

**Figure S4. Netrin-1 does not regulate cytokine production in CD4+ T cells:** CD4+CD25- T cells were activated with plate-bound anti-CD3 (1  $\mu\text{g/mL}$ ) for 24-48hrs in the absence or presence of increasing concentrations of Netrin-1 (0-1  $\mu\text{g/mL}$ ). Cytokine production was evaluated at the mRNA level by quantitative PCR. Illustrated is the representative expression of A) IFN- $\gamma$ , B) IL-2, C) IL-17A and D) IL-4. Panels A-D show the mean fold change in mRNA expression  $\pm$ SEM. Average of n=2 experiments are illustrated of a total of n $\geq$ 3, all performed in duplicate.

**Supplementary Movie 1 – CD4+ T cell migration in the presence of a Netrin-1 gradient:** 48hrs mitogen activated CD4+ T cells were loaded in the microfluidic device and respond to a Netrin-1 gradient (0.1 $\mu$ g/mL) over an 8hr time period.

**Supplementary Movie 2 – CD4+ T cell migration in media alone:** 48hrs mitogen activated CD4+ T cells show spontaneous migratory behavior in the absence of a chemokine gradient over an 8hr time period.
